# Supplementary material for: External validation of computed tomography decision rules for minor head injury: prospective, multicentre cohort study in the Netherlands
Source: PubMed Central journal article supplement — BMJ. 2018 Aug 24;362:k3527. doi: 10.1136/bmj.k3527 (PMC6108278; doi:10.1136/bmj.k3527), 2018-08-24
Supplement: foks044017.ww.pdf [file foks044017.ww.pdf]

## Supplementary materials

### Appendix 1. Overview of decision rules CCHR, NOC, CHIP and NICE

| Study                                                                          | Patient population                                                                                                                                         | Indications for CT                                                                                                                                                                                                                                                                                                                                                                                                                                                                                                                                                                                                                                                                                                                                                                                                                                 |
|--------------------------------------------------------------------------------|------------------------------------------------------------------------------------------------------------------------------------------------------------|----------------------------------------------------------------------------------------------------------------------------------------------------------------------------------------------------------------------------------------------------------------------------------------------------------------------------------------------------------------------------------------------------------------------------------------------------------------------------------------------------------------------------------------------------------------------------------------------------------------------------------------------------------------------------------------------------------------------------------------------------------------------------------------------------------------------------------------------------|
| NOC: New Orleans Criteria<br>Haydel et al, 2000                                | GCS score of 15, loss of consciousness, normal findings on brief neurological examination, >3y                                                             | <u>Clinical findings:</u><br><ul style="list-style-type: none"> <li>- Headache (diffuse or local)</li> <li>- Vomiting</li> <li>- Age &gt;60 years</li> <li>- Drug or alcohol intoxication</li> <li>- Deficits in short-term memory (persistent anterograde amnesia in patient with otherwise normal GCS)</li> <li>- Physical evidence of trauma above clavicles</li> <li>- Seizure</li> </ul>                                                                                                                                                                                                                                                                                                                                                                                                                                                      |
| CCHR: Canadian CT Head Rule<br>Stiell et al, 2001                              | GCS score 13-15, witnessed LOC, definite amnesia or witnessed disorientation, age >16y<br>Exclusion: use of anticoagulation or obvious open skull fracture | <u>High risk for intervention:</u><br><ul style="list-style-type: none"> <li>- GCS&lt;15 at 2 hours after injury</li> <li>- Suspected open or depressed skull fracture</li> <li>- Any sign of basal skull fracture</li> <li>- Vomiting 2 or more episodes</li> <li>- Age 65 years or older</li> </ul> <u>Medium risk for brain injury on CT:</u><br><ul style="list-style-type: none"> <li>- Amnesia before impact 30 min or more</li> <li>- Dangerous mechanism (pedestrian vs vehicle, occupant ejected from vehicle, fall from elevation 3 feet or more, or 5 stairs)</li> </ul>                                                                                                                                                                                                                                                                |
| CHIP: CT in Head Injury Patients<br>Smits et al, 2007                          | GCS 13-14 or GCS of 15 and 1 risk factor, age ≥16                                                                                                          | <u>CT indicated if ≥1 major criterion:</u><br><ul style="list-style-type: none"> <li>- Pedestrian or cyclist vs vehicle</li> <li>- Ejected from vehicle</li> <li>- Vomiting</li> <li>- PTA of 4 hours or more</li> <li>- Clinical sign of skull fracture</li> <li>- GCS&lt;15</li> <li>- GCS deterioration 2 or more points (1hr after presentation)</li> <li>- Use of anticoagulant therapy</li> <li>- Posttraumatic seizure</li> <li>- Age 60 years or older</li> </ul> <u>CT indicated if ≥2 minor criteria:</u><br><ul style="list-style-type: none"> <li>- Fall from any elevation</li> <li>- Persistent anterograde amnesia</li> <li>- PTA of 2-4 hours</li> <li>- Contusion of skull</li> <li>- Neurologic deficit</li> <li>- LOC</li> <li>- GCS deterioration of 1 point (1 hour after presentation)</li> <li>- Age 40-60 years</li> </ul> |
| NICE: National Institute for Health and Care Excellence guideline: Head injury | Adults with head injury                                                                                                                                    | <u>Perform CT within 1 hour:</u><br><ul style="list-style-type: none"> <li>- GCS&lt;13</li> <li>- GCS&lt;15 at 2 hours after injury</li> <li>- Suspected open or depressed skull fracture</li> <li>- Any sign of basal skull fracture</li> <li>- Posttraumatic seizure</li> <li>- Focal neurologic deficit</li> <li>- More than one episode of vomiting since head injury</li> </ul> <u>Perform CT within 8 hours:</u><br><ul style="list-style-type: none"> <li>- Current warfarin treatment</li> </ul> <u>LOC and/or PTA and:</u><br><ul style="list-style-type: none"> <li>- Age &gt;65 years</li> <li>- History bleeding or clotting disorder</li> <li>- Dangerous mechanism of injury</li> <li>- More than 30minutes retrograde amnesia of events before head injury</li> </ul>                                                               |

CT = computed tomography, GCS = Glasgow Coma Scale, PTA = posttraumatic amnesia, LOC = loss of consciousness

## Appendix 2. Overview CT guidelines used in participating centres

|                                 | National guideline                                                                                                                                                                                                                                                                                                                                                                                                                                                                                                               | Local guideline 1                                                                                                                                                                                                                                                                                                                                                                                                                                                                                                                                                                                                                                                                | Local guideline 2                                                                                                                                                                                                                                                                                                                                                                                                                                                                          |
|---------------------------------|----------------------------------------------------------------------------------------------------------------------------------------------------------------------------------------------------------------------------------------------------------------------------------------------------------------------------------------------------------------------------------------------------------------------------------------------------------------------------------------------------------------------------------|----------------------------------------------------------------------------------------------------------------------------------------------------------------------------------------------------------------------------------------------------------------------------------------------------------------------------------------------------------------------------------------------------------------------------------------------------------------------------------------------------------------------------------------------------------------------------------------------------------------------------------------------------------------------------------|--------------------------------------------------------------------------------------------------------------------------------------------------------------------------------------------------------------------------------------------------------------------------------------------------------------------------------------------------------------------------------------------------------------------------------------------------------------------------------------------|
| <b>Number of centres</b>        | 7                                                                                                                                                                                                                                                                                                                                                                                                                                                                                                                                | 1                                                                                                                                                                                                                                                                                                                                                                                                                                                                                                                                                                                                                                                                                | 1                                                                                                                                                                                                                                                                                                                                                                                                                                                                                          |
| <b>1 or more major criteria</b> | <ul style="list-style-type: none"> <li>- GCS &lt; 15 (including persisting PTA)</li> <li>- 2 or more points deterioration in GCS (1 hour after presentation)</li> <li>- Vomiting</li> <li>- Posttraumatic seizure</li> <li>- Signs of skull fracture</li> <li>- Pedestrian or cyclist versus vehicle</li> <li>- Ejected from motor vehicle</li> <li>- PTA ≥ 4 hours</li> <li>- Use of anticoagulants</li> <li>- Focal neurologic deficit</li> <li>- Suspicion of intracranial injury after focal “high impact” injury</li> </ul> | <ul style="list-style-type: none"> <li>- GCS &lt; 15</li> <li>- 2 or more points deterioration in GCS (1 hour after presentation)</li> <li>- Vomiting</li> <li>- Posttraumatic seizure</li> <li>- Age ≥60 years</li> <li>- Signs of skull fracture</li> <li>- Dangerous mechanism (Pedestrian or cyclist versus vehicle; Ejected from motor vehicle; Fall from more than 1m or 5 stairs; Or equivalent mechanism)</li> <li>- Post traumatic amnesia ≥ 4 hours</li> <li>- Coagulopathy, e.g. use of coumarin derivate (INR &gt;1.7), NOACs, or chronic alcohol abuse</li> <li>- Focal neurologic deficit</li> <li>- Intoxication that impairs neurological examination</li> </ul> | <ul style="list-style-type: none"> <li>- GCS &lt; 15 (including persisting PTA)</li> <li>- Deterioration in GCS</li> <li>- Vomiting &gt; 1 time</li> <li>- Posttraumatic seizure</li> <li>- Signs of skull fracture</li> <li>- Dangerous mechanism (Pedestrian or cyclist versus vehicle; Ejected from motor vehicle; Fall from high elevation)</li> <li>- Post traumatic amnesia &gt; 1 hour</li> <li>- Use of anticoagulants/coagulopathy</li> <li>- Focal neurologic deficit</li> </ul> |
| <b>2 or more minor criteria</b> | <ul style="list-style-type: none"> <li>- Fall from any elevation</li> <li>- LOC</li> <li>- Posttraumatic amnesia 2-4 hours</li> <li>- Visible injury to the head, excluding the face (without signs of fracture)</li> <li>- 1 point deterioration in GCS (1 hour post presentation)</li> <li>- Age &gt; 40 years</li> </ul>                                                                                                                                                                                                      | <ul style="list-style-type: none"> <li>- Fall from &lt; 1 m</li> <li>- LOC</li> <li>- PTA 2-4 hours</li> <li>- Persisting PTA (recall deficit)</li> <li>- Traumatic injury above the clavicles</li> <li>- 1 point deterioration in GCS (1 hour post presentation)</li> <li>- Age 40-60 years</li> </ul>                                                                                                                                                                                                                                                                                                                                                                          | <ul style="list-style-type: none"> <li>- Fall from any elevation</li> <li>- LOC</li> <li>- Unclear trauma mechanism</li> <li>- Visible injury to the head, excluding the face (without signs of fracture)</li> <li>- Violence</li> <li>- Age &gt; 65 years</li> </ul>                                                                                                                                                                                                                      |

*CT = computed tomography, GCS = Glasgow Coma Scale, PTA = posttraumatic amnesia, LOC =loss of consciousness, INR = international normalized ratio, NOACS = novel oral anticoagulants*

### Appendix 3. Performance of the CT decision rules

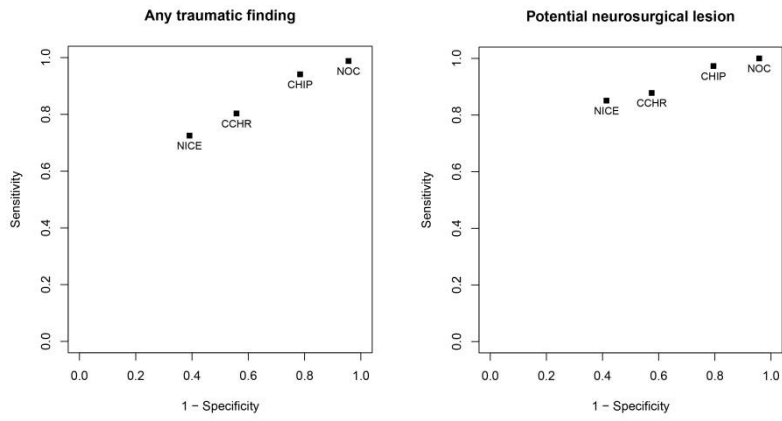

*CT = computed tomography, CHIP = CT in head Injury Patient rule, NICE = National Institute for Health and Care Excellence, NOC = New Orleans Criteria, CCHR = Canadian CT Head Rule*

#### Appendix 4. Overview of missed neurosurgical lesions

|    | Patient characteristics                                                                                  | CT result                                                      | Missed by rule   |
|----|----------------------------------------------------------------------------------------------------------|----------------------------------------------------------------|------------------|
| 1  | 32y, assault blunt instrument, intoxication, significant injury to the head, focal high impact injury    | Small EDH, skull fracture                                      | CHIP, NICE, CCHR |
| 2  | 21y, scooter vs motor vehicle, high energy trauma, significant injury to face and head                   | Small EDH, small ASDH, skull fracture                          | CHIP, NICE, CCHR |
| 3  | 69y, fall from scooter, headache, significant injury to the head                                         | Small EDH                                                      | NICE             |
| 4  | 52y, fall from standing height, LOC, PTA, significant injury to the head                                 | Small EDH, tSAH                                                | NICE, CCHR       |
| 5  | 37y, fall from scooter, intoxication, LOC, retrograde amnesia <30 min, PTA 2-4hrs                        | Small EDH, tSAH, small ASDH                                    | NICE, CCHR       |
| 6  | 26y, forklift against head, LOC, PTA, headache, significant injury to the head, focal high impact injury | Small EDH, tSAH, small ASDH, contusion (small), skull fracture | NICE, CCHR       |
| 7  | 22y, fall from standing height, LOC, retrograde amnesia <30min                                           | Small EDH                                                      | NICE, CCHR       |
| 8  | 36y, assault blunt instrument, LOC, PTA, significant injury to the head, focal high impact injury        | Small EDH, skull fracture (depressed)                          | NICE, CCHR       |
| 9  | 88y, scooter vs truck, high energy trauma, significant injury to the head                                | Small EDH, skull fracture                                      | NICE             |
| 10 | 24y, bicycle vs motor vehicle, high energy trauma, significant injury to the face, LOC, PTA, headache    | Small EDH, contusion (small), skull fracture                   | CCHR             |
| 11 | 40y, bicycle vs bicycle, significant injury to the head, PTA, headache                                   | Small EDH, contusion (small), skull fracture                   | NICE, CCHR       |
| 12 | 89y, fall from standing height, significant injury to the face                                           | Large ASDH                                                     | NICE             |

*CT = computed tomography, EDH = epidural hematoma, CHIP = CT in head Injury Patient rule, NICE = National Institute for Health and Care Excellence, CCHR = Canadian CT Head Rule ASDH = acute subdural hematoma, LOC = loss of consciousness, PTA = posttraumatic amnesia, tSAH = traumatic subarachnoid hemorrhage*

**Appendix 5a. NOC and CCHR validation in population with in- and exclusion criteria as in development cohort from six centres\***

|                                                                                                            | <b>Positive outcome (No)</b> | <b>Negative outcome (No)</b> | <b>Sensitivity (%; 95% CI)</b> | <b>Specificity (%; 95% CI)</b> |
|------------------------------------------------------------------------------------------------------------|------------------------------|------------------------------|--------------------------------|--------------------------------|
| <i>Original NOC n=1147 (subset of population with in- and exclusion criteria of original NOC study)</i>    |                              |                              |                                |                                |
| <b>Any traumatic finding on CT</b>                                                                         |                              |                              | 98.6 (96.4 to 100)             | 3.5 (2.4 to 4.5)               |
| NOC - Positive                                                                                             | 137                          | 973                          |                                |                                |
| NOC - Negative                                                                                             | 2                            | 35                           |                                |                                |
| <b>Potential neurosurgical lesion</b>                                                                      |                              |                              | 100 (100 to 100)               | 3.3 (2.3 to 4.2)               |
| NOC - Positive                                                                                             | 20                           | 1090                         |                                |                                |
| NOC - Negative                                                                                             | 0                            | 37                           |                                |                                |
| <i>Original CCHR n= 1683 (subset of population with in- and exclusion criteria of original CCHR study)</i> |                              |                              |                                |                                |
| <b>Any traumatic finding on CT</b>                                                                         |                              |                              | 81.6 (76.8 to 86.2)            | 42.5 (39.9 to 45.1)            |
| CCHR - Positive                                                                                            | 209                          | 821                          |                                |                                |
| CCHR - Negative                                                                                            | 47                           | 606                          |                                |                                |
| <b>Potential neurosurgical lesion</b>                                                                      |                              |                              | 85.1 (74.0 to 94.2)            | 39.5 (37.2 to 41.9)            |
| CCHR - Positive                                                                                            | 40                           | 990                          |                                |                                |
| CCHR - Negative                                                                                            | 7                            | 646                          |                                |                                |

NOC = New Orleans Criteria, CCHR = Canadian CT Head Rule, CT= computed tomography

\*These centres refer to those on the left hand side of figure 1

**Appendix 5b. Adjusted NOC and adjusted CCHR validation in entire study population from six centres\*,**

|                                                                                                      | <b>Positive outcome (No)</b> | <b>Negative outcome (No)</b> | <b>Sensitivity (%; 95% CI)</b> | <b>Specificity (%; 95% CI)</b> |
|------------------------------------------------------------------------------------------------------|------------------------------|------------------------------|--------------------------------|--------------------------------|
| <i>Adjusted NOC n=4557 (including in- and exclusion criteria of original study as risk factors)</i>  |                              |                              |                                |                                |
| <b>Any traumatic finding on CT</b>                                                                   |                              |                              | 98.8 (97.6 to 99.8)            | 4.0 (3.4 to 4.5)               |
| NOC - Positive                                                                                       | 402                          | 3984                         |                                |                                |
| NOC - Negative                                                                                       | 5                            | 166                          |                                |                                |
| <b>Potential neurosurgical lesion</b>                                                                |                              |                              | 100 (100 to 100)               | 3.8 (3.2 to 4.3)               |
| NOC - Positive                                                                                       | 74                           | 4312                         |                                |                                |
| NOC - Negative                                                                                       | 0                            | 171                          |                                |                                |
| <i>Adjusted CCHR n=4557 (including in- and exclusion criteria of original study as risk factors)</i> |                              |                              |                                |                                |
| <b>Any traumatic finding on CT</b>                                                                   |                              |                              | 81.8 (77.6 to 85.7)            | 42.0 (40.4 to 43.6)            |
| CCHR - Positive                                                                                      | 333                          | 2409                         |                                |                                |
| CCHR - Negative                                                                                      | 74                           | 1741                         |                                |                                |
| <b>Potential neurosurgical lesion</b>                                                                |                              |                              | 87.8 (79.7 to 94.9)            | 40.3 (38.9 to 41.7)            |
| CCHR - Positive                                                                                      | 65                           | 2677                         |                                |                                |
| CCHR - Negative                                                                                      | 9                            | 1806                         |                                |                                |

NOC = New Orleans Criteria, CCHR = Canadian CT Head Rule, CT= computed tomography

\*These centres refer to those on the left hand side of figure 1

**Appendix 6a. Performance of rules with outcome neurosurgical intervention from six centres\*,**

|                                   | <b>Positive outcome (No)</b> | <b>Negative outcome (No)</b> | <b>Sensitivity (%; 95% CI)</b> | <b>Specificity (%; 95% CI)</b> |
|-----------------------------------|------------------------------|------------------------------|--------------------------------|--------------------------------|
| <i>CHIP n=4557</i>                |                              |                              |                                |                                |
| <b>Neurosurgical intervention</b> |                              |                              | 94.4 (81.8 to 100)             | 20.3 (19.2 to 21.4)            |
| CHIP - Positive                   | 17                           | 3619                         |                                |                                |
| CHIP - Negative                   | 1                            | 920                          |                                |                                |
| <i>NICE n=4557</i>                |                              |                              |                                |                                |
| <b>Neurosurgical intervention</b> |                              |                              | 88.9 (71.4 to 100)             | 58.1 (56.6 to 59.6)            |
| NICE - Positive                   | 16                           | 1903                         |                                |                                |
| NICE - Negative                   | 2                            | 2636                         |                                |                                |
| <i>NOC n=4557</i>                 |                              |                              |                                |                                |
| <b>Neurosurgical intervention</b> |                              |                              | 100 (100 to 100)               | 4.2 (3.6 to 4.7)               |
| NOC - Positive                    | 18                           | 4350                         |                                |                                |
| NOC - Negative                    | 0                            | 189                          |                                |                                |
| <i>CCHR n=4557</i>                |                              |                              |                                |                                |
| <b>Neurosurgical intervention</b> |                              |                              | 88.9 (71.4 to 100)             | 42.2 (40.7 to 43.8)            |
| CCHR - Positive                   | 16                           | 2625                         |                                |                                |
| CCHR - Negative                   | 2                            | 1914                         |                                |                                |

*CHIP = CT in head Injury Patient rule, NICE = National Institute for Health and Care Excellence, NOC = New Orleans Criteria, CCHR = Canadian CT Head Rule*

*\*These centres refer to those on the left hand side of figure 1*

**Appendix 6b** Decision curves showing net proportional benefit for the outcome neurosurgical intervention.

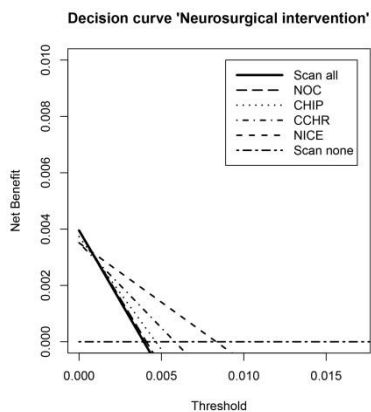

*CT = computed tomography, CHIP = CT in head Injury Patient rule, NICE = National Institute for Health and Care Excellence, NOC = New Orleans Criteria, CCHR = Canadian CT Head Rule*

*Per rule net proportional benefit was calculated using the formula: (true positives/total number) – weight\*(false positives/total number).*

**Appendix 7a. Baseline characteristics all patients with a CT scan from nine centers\***

|                                                              | Patients with normal CT findings (n=4174) | Patients with abnormal CT findings (n=528) | All patients with a CT scan (n=4702) |
|--------------------------------------------------------------|-------------------------------------------|--------------------------------------------|--------------------------------------|
| Age (years; mean(range))                                     | 55.5 (16-101)                             | 58.6 (16-98)                               | 55.9 (16-101)                        |
| Male sex                                                     | 2372 (56.8%)                              | 337 (63.8%)                                | 2709 (57.6%)                         |
| Glasgow coma scale score at presentation                     |                                           |                                            |                                      |
| - 13                                                         | 138 (3.3%)                                | 69 (13.1%)                                 | 207 (4.4%)                           |
| - 14                                                         | 557 (13.3%)                               | 140 (26.5%)                                | 697 (14.8%)                          |
| - 15                                                         | 3479 (83.3%)                              | 319 (60.4%)                                | 3798 (80.8%)                         |
| Use of anticoagulation                                       |                                           |                                            |                                      |
| - None                                                       | 3581 (85.8%)                              | 474 (89.8%)                                | 4055 (86.2%)                         |
| - Coumarin                                                   | 490 (11.7%)                               | 45 (8.5%)                                  | 535 (11.4%)                          |
| - Direct oral anticoagulants                                 | 56 (1.3%)                                 | 3 (0.6%)                                   | 59 (1.3%)                            |
| Bleeding disorder                                            | 47 (1.1%)                                 | 3 (0.6%)                                   | 50 (1.1%)                            |
| Mechanism of injury                                          |                                           |                                            |                                      |
| - Pedestrian in road traffic accident                        | 60 (1.4%)                                 | 12 (2.3%)                                  | 72 (1.5%)                            |
| - Cyclist in road traffic accident                           | 164 (3.9%)                                | 36 (6.8%)                                  | 200 (4.3%)                           |
| - Fall from height                                           | 574 (13.8%)                               | 124 (23.5%)                                | 698 (14.8%)                          |
| - Other†                                                     | 3325 (79.7%)                              | 348 (65.9%)                                | 3673 (78.1%)                         |
| Ejected from vehicle                                         | 183 (4.4%)                                | 32 (6.1%)                                  | 215 (4.6%)                           |
| Loss of consciousness                                        |                                           |                                            |                                      |
| - None                                                       | 2192 (52.5%)                              | 153 (29.0%)                                | 2345 (49.9%)                         |
| - 15 minutes or less                                         | 1238 (29.7%)                              | 225 (42.6%)                                | 1463 (31.1%)                         |
| - More than 15 minutes                                       | 30 (0.7%)                                 | 18 (3.4%)                                  | 48 (1.0%)                            |
| Retrograde amnesia                                           |                                           |                                            |                                      |
| - None                                                       | 2819 (67.5%)                              | 227 (43.0%)                                | 3046 (64.8%)                         |
| - 30 minutes or less                                         | 445 (10.7%)                               | 96 (18.2%)                                 | 541 (11.5%)                          |
| - More than 30 minutes                                       | 142 (3.4%)                                | 58 (11.0%)                                 | 200 (4.3%)                           |
| Post-traumatic amnesia                                       |                                           |                                            |                                      |
| - None                                                       | 2456 (58.8%)                              | 154 (29.2%)                                | 2610 (55.5%)                         |
| - Up to 2 hours                                              | 970 (23.2%)                               | 200 (37.9%)                                | 1170 (24.9%)                         |
| - 2-4 hours                                                  | 80 (1.9%)                                 | 22 (4.2%)                                  | 102 (2.2%)                           |
| - More than 4 hours                                          | 144 (3.4%)                                | 64 (12.1%)                                 | 208 (4.4%)                           |
| Intoxication with drugs or alcohol‡                          | 1075 (25.8%)                              | 117 (22.2%)                                | 1192 (25.4%)                         |
| Post-traumatic seizure                                       | 31 (0.7%)                                 | 11 (2.1%)                                  | 42 (0.9%)                            |
| Headache                                                     | 1358 (32.5%)                              | 184 (34.8%)                                | 1542 (32.8%)                         |
| Vomiting                                                     |                                           |                                            |                                      |
| - Once                                                       | 173 (4.1%)                                | 27 (5.1%)                                  | 200 (4.3%)                           |
| - Twice or more                                              | 161 (3.9%)                                | 35 (6.6%)                                  | 196 (4.2%)                           |
| Deterioration in Glasgow coma scale (1 h after presentation) |                                           |                                            |                                      |
| - 1 point                                                    | 35 (0.8%)                                 | 6 (1.1%)                                   | 41 (0.9%)                            |
| - 2 or more points                                           | 9 (0.2%)                                  | 9 (1.7%)                                   | 18 (0.4%)                            |
| Neurological deficit                                         | 104 (2.5%)                                | 29 (5.5%)                                  | 133 (2.8%)                           |
| Signs of skull base fracture                                 | 109 (2.6%)                                | 77 (14.6%)                                 | 186 (4.0%)                           |
| Visible injury of the head                                   | 2237 (53.6%)                              | 338 (64.0%)                                | 2575 (54.8%)                         |
| Visible injury of the face                                   | 1420 (34.0%)                              | 178 (33.7%)                                | 1598 (34.0%)                         |
| Suspicion of open fracture                                   | 8 (0.2%)                                  | 17 (3.2%)                                  | 25 (0.5%)                            |
| Injury Severity Score (mean (range))                         | 6.5 (0-54)                                | 15.3 (1-75)                                | 7.5 (0-75)                           |

Data are number (%) of patients unless stated otherwise. CT = computed tomography, .

\*These centres refer to those on the right hand side of figure 1

†Includes patients with mild head injury such as a bumped head against an object

‡history or suggestive findings on examination (for example nystagmus, abnormal walking, etc.)

**Appendix 7b. Traumatic CT findings all patients with a CT scan from nine centers\***

| <b>CT finding</b>                        | <b>N (%)*</b> |
|------------------------------------------|---------------|
| CT finding                               | 528 (11.2%)   |
| Skull fracture                           | 213 (4.5%)    |
| - Depressed fracture                     | 25 (0.5%)     |
| - Linear fracture                        | 103 (2.2%)    |
| - Skull base fracture                    | 89 (1.8%)     |
| Subarachnoid hemorrhage                  | 266 (5.7%)    |
| Contusion                                |               |
| - Small                                  | 154 (3.3%)    |
| - Large (mass)                           | 14 (0.3%)     |
| Subdural hematoma                        |               |
| - Small                                  | 173 (3.7%)    |
| - Large (mass)                           | 27 (0.6%)     |
| Epidural hematoma                        |               |
| - Small                                  | 47 (1.0%)     |
| - Large (mass)                           | 5 (0.1%)      |
| Suspicion of diffuse axonal injury on CT | 14 (0.3%)     |
| Basal cisterns compressed or obliterated | 13 (0.3%)     |
| CT shift                                 |               |
| - 0-4mm                                  | 22 (0.5%)     |
| - 5mm or more                            | 13 (0.3%)     |

*CT = computed tomography*

*\*These centres refer to those on the right hand side of figure 1*

*\*some patients had more than 1 CT finding*



## Appendix 7c. Figures secondary analysis all patients with a CT

### I. Performance CT decision rules

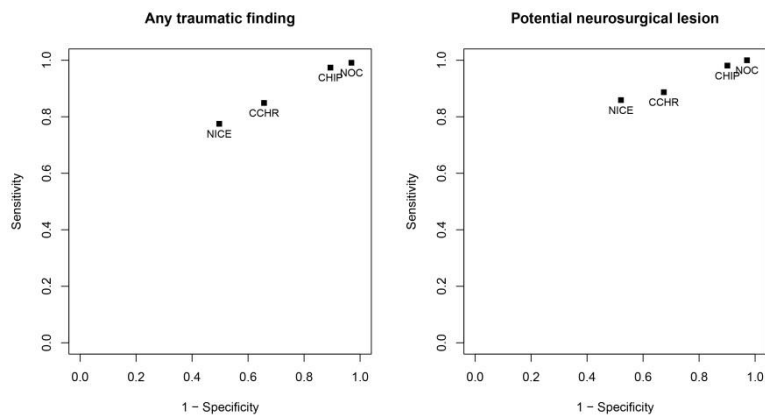

CT = computed tomography, CHIP = CT in head Injury Patient rule, NICE = National Institute for Health and Care Excellence, NOC = New Orleans Criteria, CCHR = Canadian CT Head Rule

### II. Decision curves showing net proportional benefit per decision rule

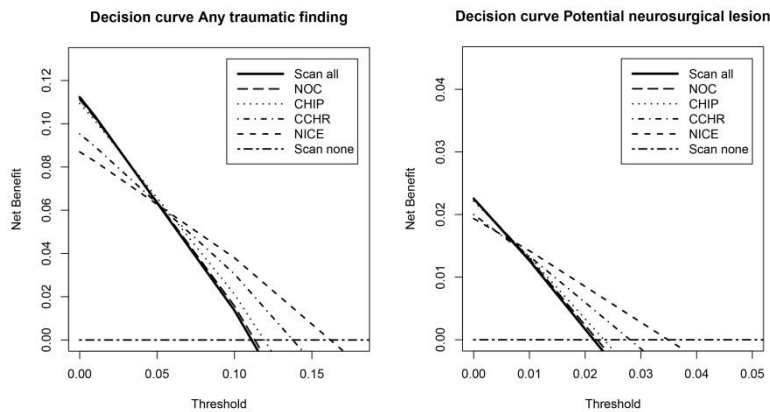

CT = computed tomography, CHIP = CT in head Injury Patient rule, NICE = National Institute for Health and Care Excellence, NOC = New Orleans Criteria, CCHR = Canadian CT Head Rule

Per rule net proportional benefit was calculated using the formula:  $(\text{true positives}/\text{total number}) - \text{weight} * (\text{false positives}/\text{total number})$ .
